# Supplementary material
Source: MDPI journal article supplement (https://www.mdpi.com/2297-8739/9/6/138)
Supplement: s1 [file s1]

## Supplementary materials

**Phytochemical characterization, Heavy Metals and Thermal analyses of *Saussurea hypoleuca* root and evaluation of its Anthelmintic and Antioxidant Activity *in Vitro* and *in Silico***

**Figure S1:**  $^1\text{H}$ -NMR and  $^{13}\text{C}$ -NMR spectral data of compound (1)

**Figure S2:**  $^1\text{H}$ -NMR and  $^{13}\text{C}$ -NMR spectral data of compound (2)

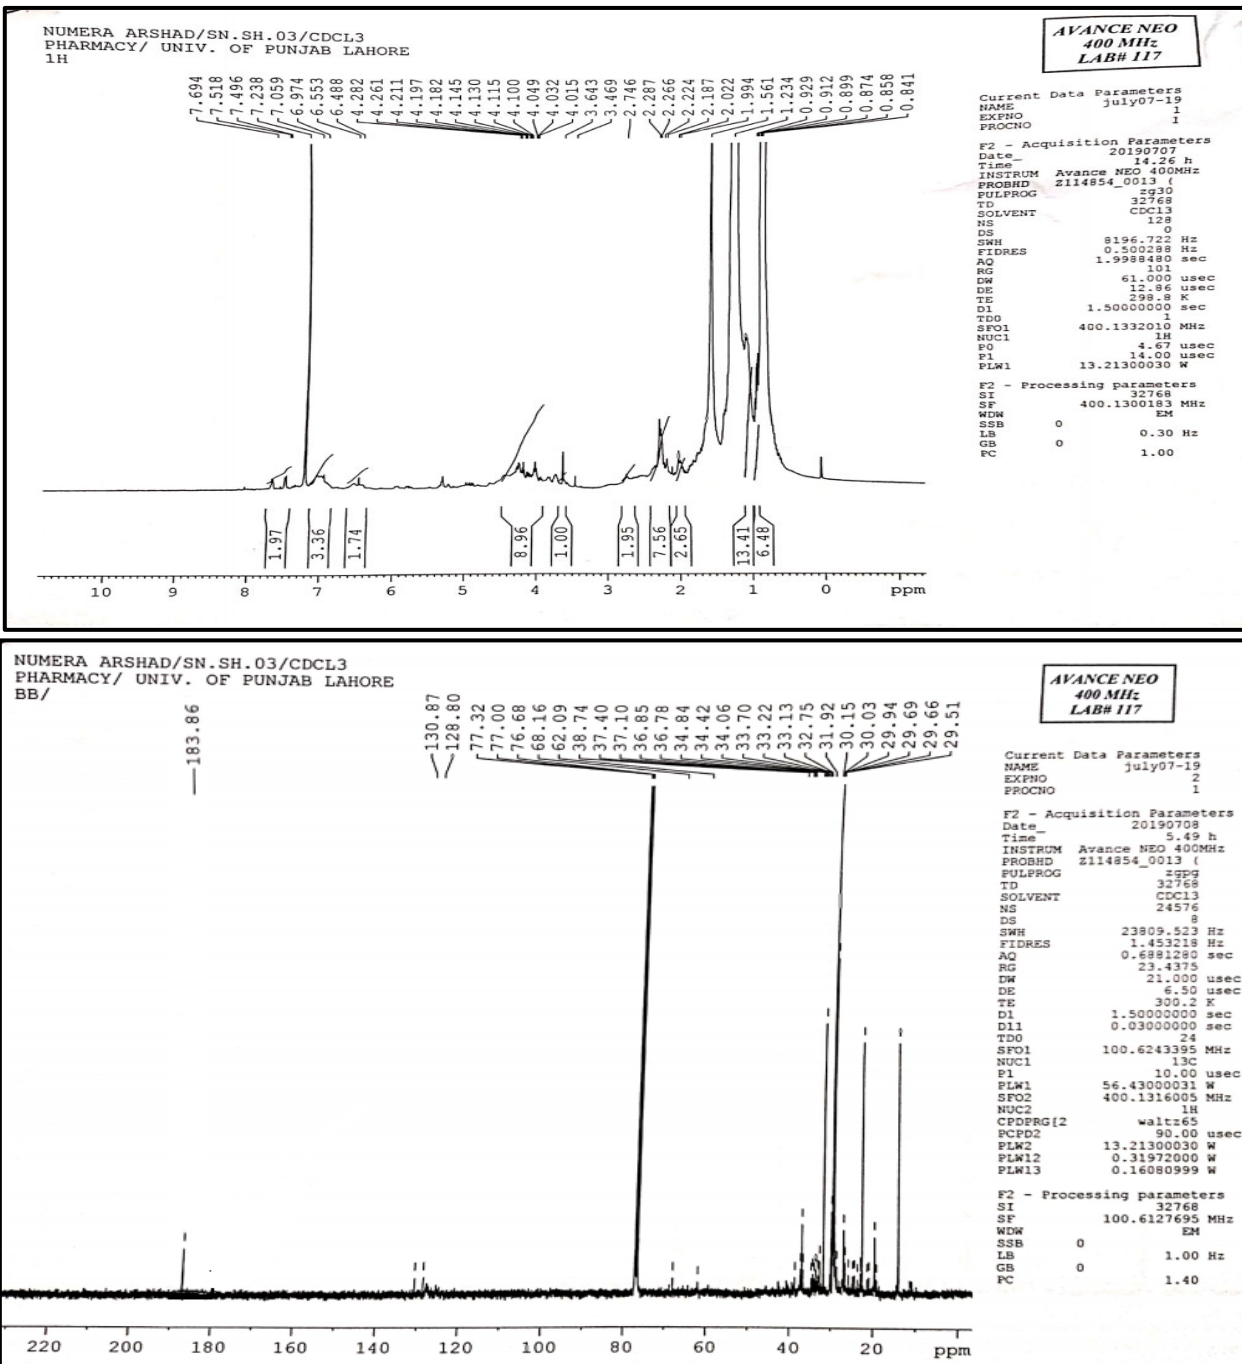

Figure S1.:  $^1\text{H}$ -NMR and  $^{13}\text{C}$ -NMR spectral data of compound (1)

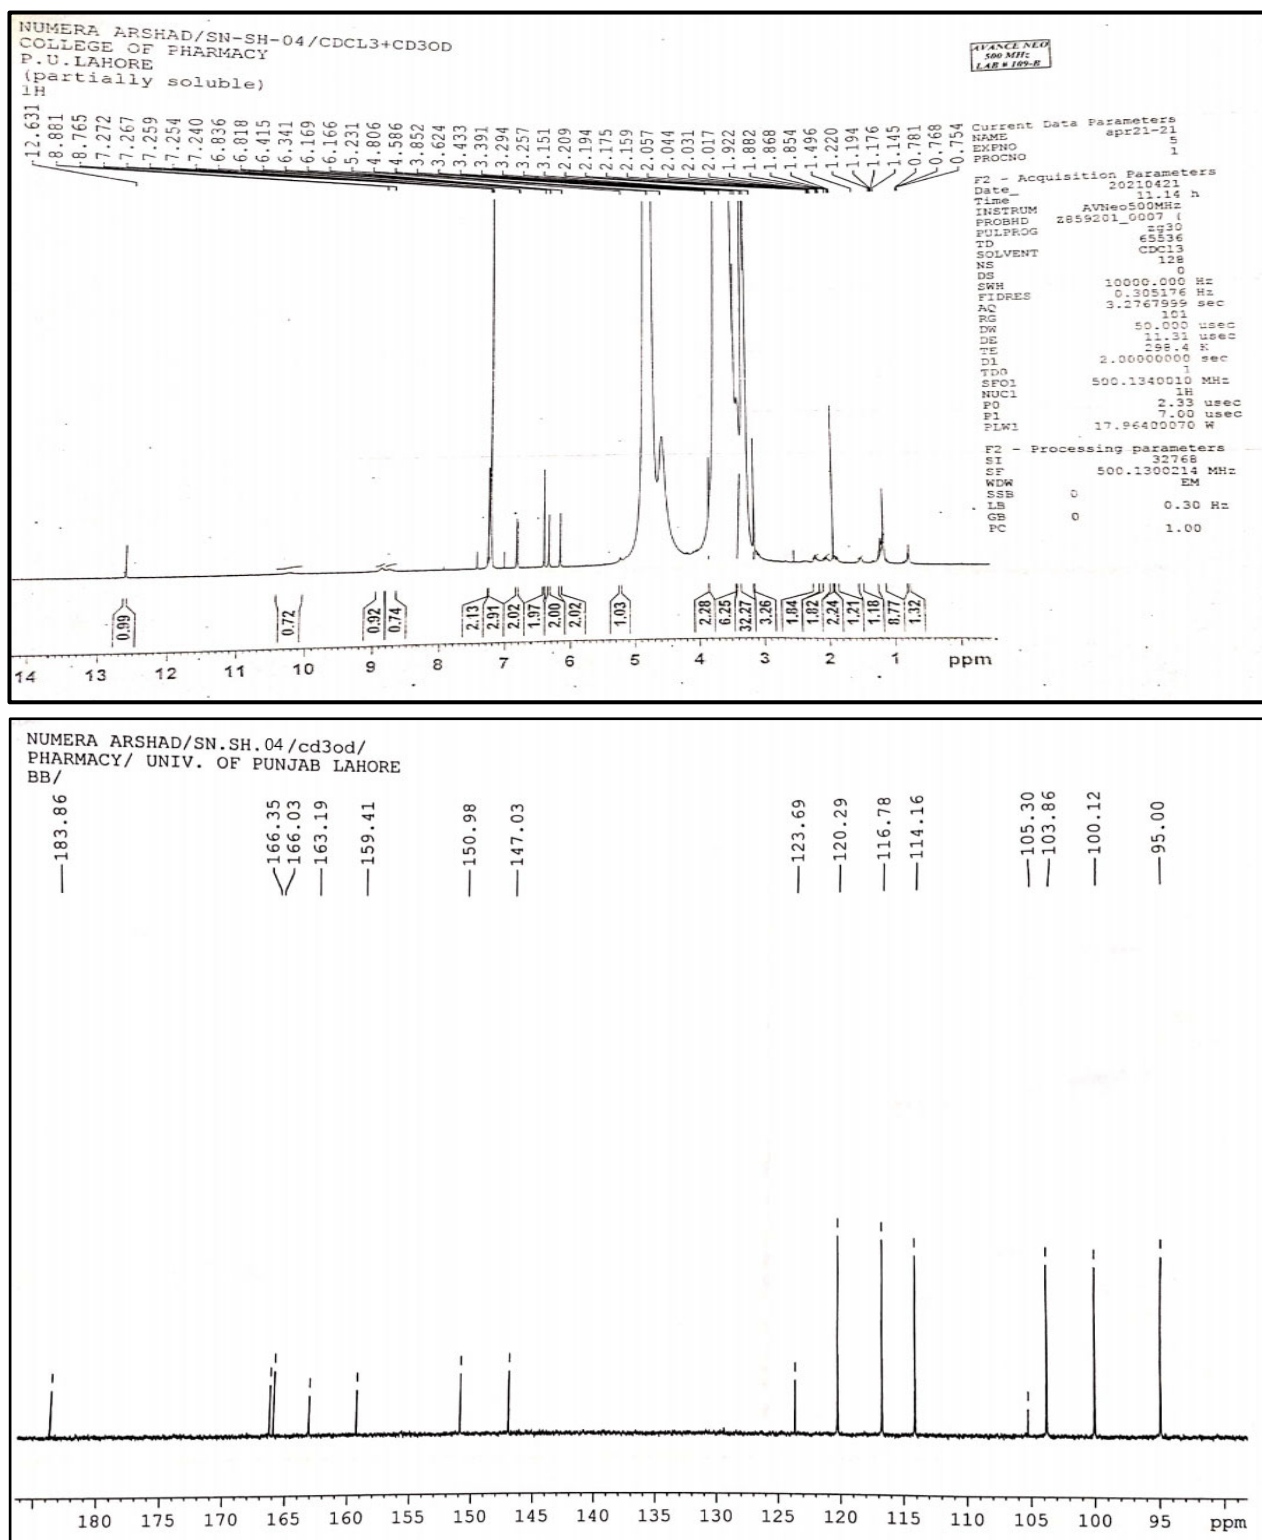

Figure S2.: <sup>1</sup>H-NMR and <sup>13</sup>C-NMR spectral data of compound (2)
